# Supplementary material for: Efficient tuning of zinc phthalocyanine-based dyes for dye-sensitized solar cells: a detailed DFT study
Source: Royal Society of Chemistry journal article supplement (doi:10.1039/d1ra04529f), 2021-01-01
Supplement: d1ra04529f1.pdf [file d1ra04529f1.pdf]

## Efficient Tuning of Zinc-phthalocyanine-Based Dyes for Dye-Sensitized Solar Cells-A Detailed DFT Study

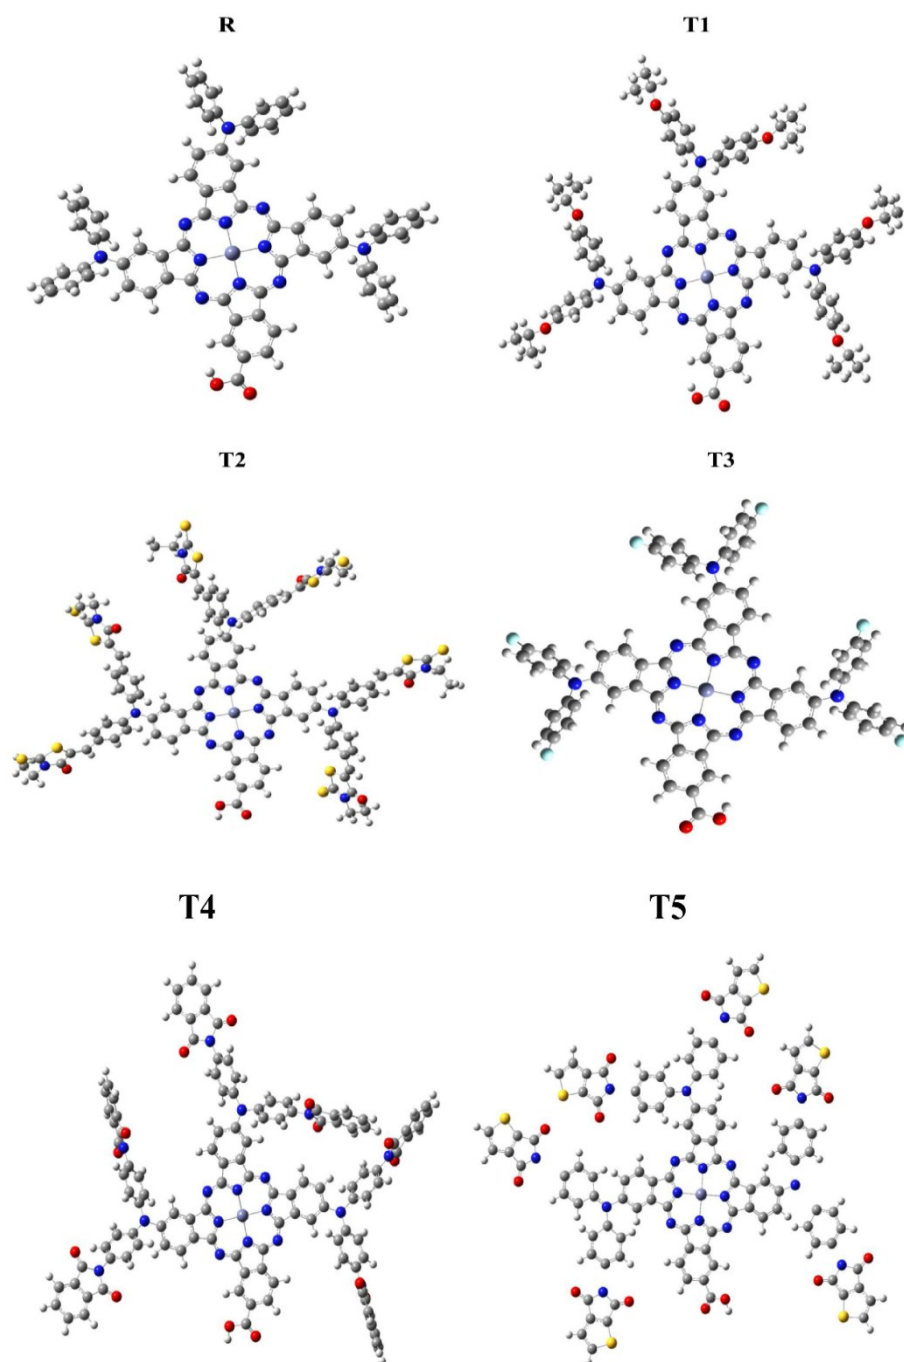

**Figure S1.** Optimized structures of reference **R** and molecules **T1**, **T2**, **T3**, **T4**, and **T5**.

# Efficient Tuning of Zinc-phthalocyanine-Based Dyes for Dye-Sensitized Solar Cells-A Detailed DFT Study

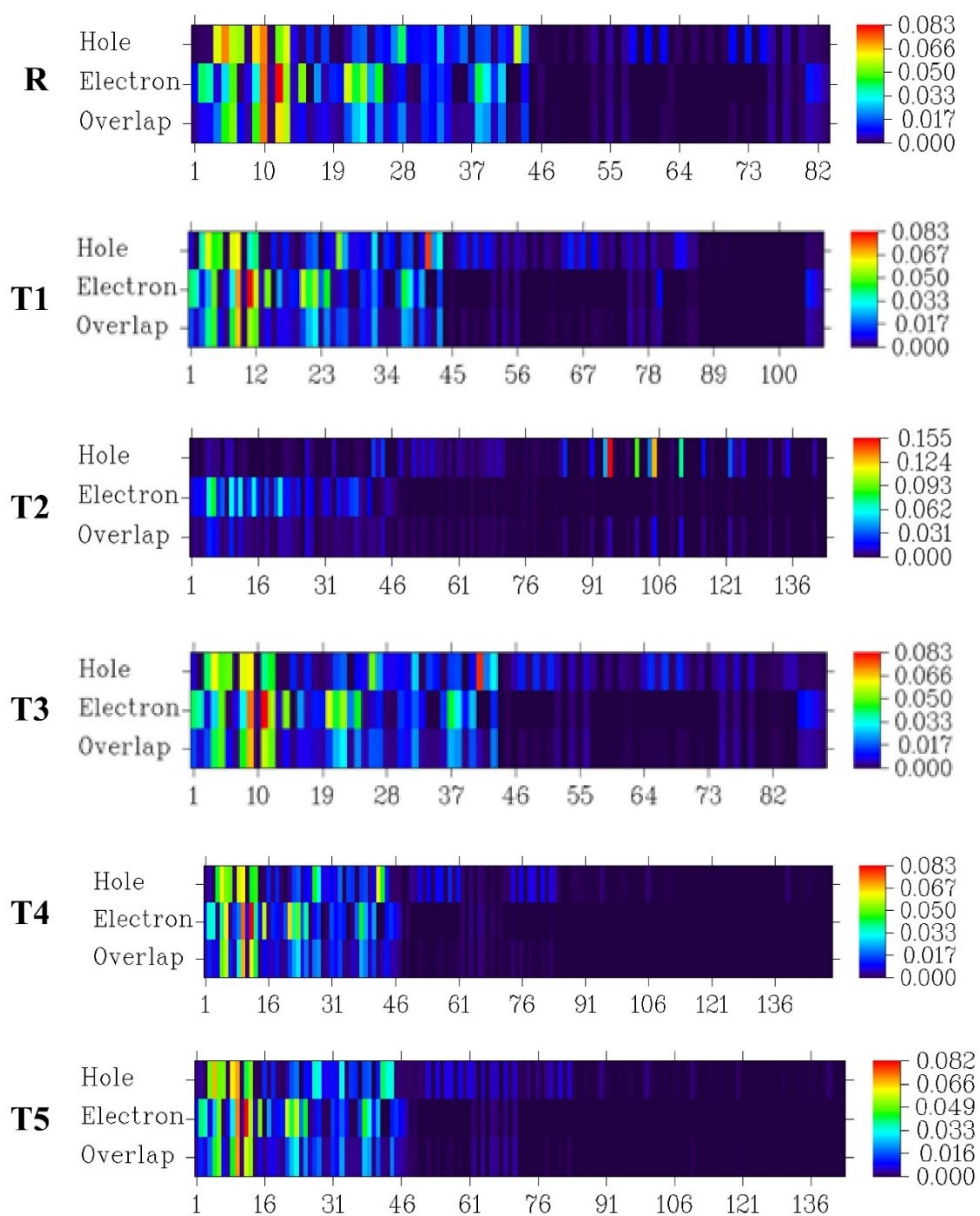

**Figure S2.** Hole-electron coupling of all designed molecules **T1-T5** and reference **R** as heat map

# Efficient Tuning of Zinc-phthalocyanine-Based Dyes for Dye-Sensitized Solar Cells-A Detailed DFT Study

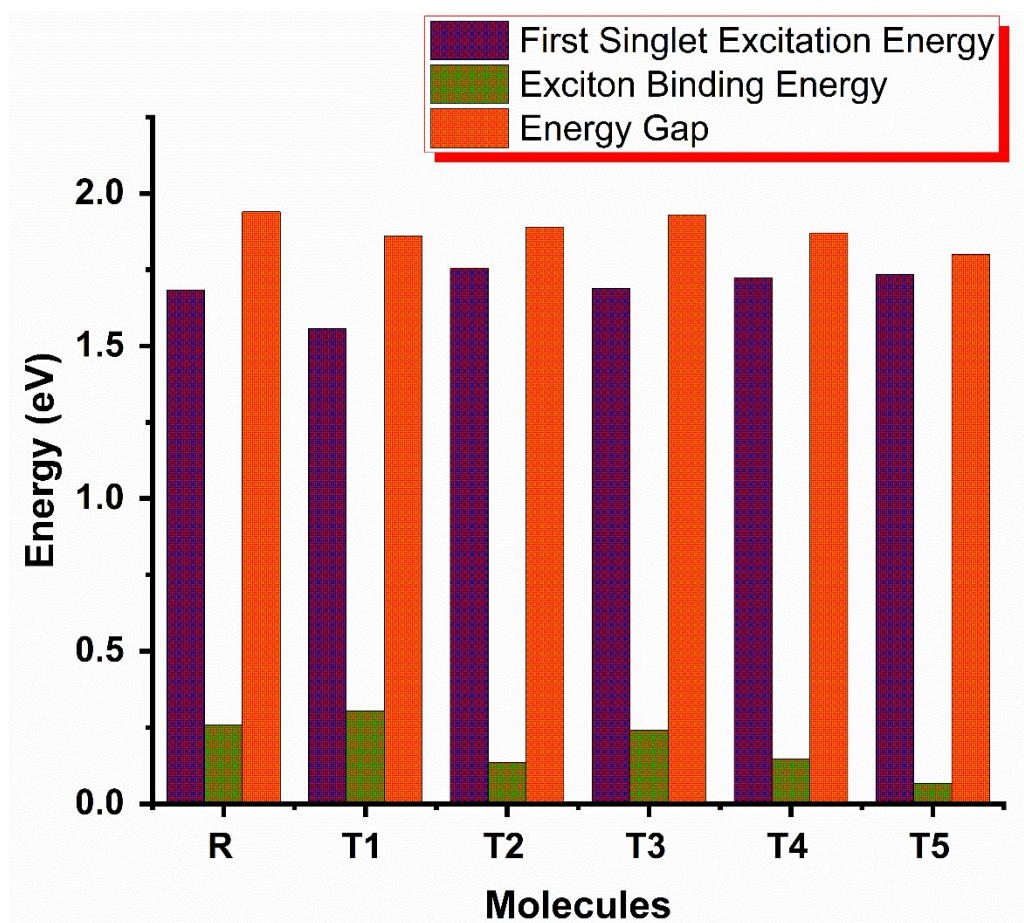

**Figure S3.** Comparison between  $E_g$ ,  $E_{opt}$  and  $E_b$  of all designed molecules (T1-T5) and reference R.

**Table S1:** Dipole moment in excited state  $\mu_e$ , ground state  $\mu_g$ , and the difference between these states for reference R and designed molecules T1, T2, T3, T4 and T5

| Molecules | $\mu_g$   | $\mu_e$   | $\mu_e - \mu_g$ |
|-----------|-----------|-----------|-----------------|
| R         | 8.510861  | 10.007204 | 1.496343        |
| T1        | 11.874998 | 14.073258 | 2.19826         |
| T2        | 5.861444  | 8.515336  | 2.653892        |
| T3        | 6.941926  | 8.468785  | 1.526859        |
| T4        | 7.053962  | 8.762656  | 1.708694        |

# Efficient Tuning of Zinc-phthalocyanine-Based Dyes for Dye-Sensitized Solar Cells-A Detailed DFT Study

T5

9.05621

10.919255

1.863045

**Table S2:** HOMO-LUMO energy gap  $E_g$ , first singlet excitation energies  $E_{opt}$ , and exciton binding energies  $E_b$

| Molecules | $E_g(eV)$ | $E_{opt}(eV)$ | $E_b(eV)$ |
|-----------|-----------|---------------|-----------|
| R         | 1.94      | 1.682         | 0.257     |
| T1        | 1.86      | 1.557         | 0.303     |
| T2        | 1.89      | 1.755         | 0.215     |
| T3        | 1.93      | 1.688         | 0.258     |
| T4        | 1.87      | 1.722         | 0.248     |
| T5        | 1.80      | 1.734         | 0.066     |
